# Supplementary material for: Detection of sudomotor alterations evaluated by Sudoscan in patients with recently diagnosed type 2 diabetes
Source: PubMed Central journal article supplement (PMC9756300; doi:10.1136/bmjdrc-2022-003005), 2022-12-15
Supplement: bmjdrc-2022-003005supp001.pdf [file bmjdrc-2022-003005supp001.pdf]

Supplementary Table 1. Treatment of the participants

| Hypoglycemic agents                          | All         | Without dysfunction (N= 1620) | Dysfunction (N= 619) | p     |
|----------------------------------------------|-------------|-------------------------------|----------------------|-------|
| Metformin (%)                                | 1755 (78.2) | 1263 (77.8)                   | 492 (79.5)           | 0.38  |
| SGLT-2 inhibitors (%)                        | 74 (3.3)    | 54 (3.3)                      | 20 (3.2)             | 0.91  |
| Sulphonylureas (%)                           | 464 (20.7)  | 340 (20.9)                    | 124 (20.0)           | 0.63  |
| GLP1 agonists (%)                            | 7 (0.3)     | 7 (0.4)                       | 0 (0.0)              | 0.10  |
| DPP-4 inhibitors (%)                         | 320 (14.3)  | 244 (15.0)                    | 76 (12.3)            | 0.09  |
| Thiazolidinedione (%)                        | 43 (1.9)    | 31 (1.9)                      | 12 (1.9)             | 0.96  |
| Basal insulin (%)                            | 169 (7.5)   | 95 (5.8)                      | 32 (5.2)             | 0.53  |
| Preprandial insulin (%)                      | 21 (0.94)   | 16 (1.0)                      | 5 (0.8)              | 0.69  |
| Antihypertensives                            |             |                               |                      |       |
| Angiotensin-converting enzyme inhibitors (%) | 154 (6.9)   | 115 (7.1)                     | 39 (6.3)             | 0.51  |
| Calcium channel blockers (%)                 | 119 (5.3)   | 76 (4.7)                      | 43 (6.9)             | 0.03  |
| Beta-blockers (%)                            | 73 (3.3)    | 41 (2.5)                      | 32 (5.2)             | 0.002 |
| Angiotensin-II receptor antagonist (%)       | 298 (13.3)  | 212 (13.1)                    | 86 (13.9)            | 0.60  |
| Diuretic                                     | 154 (6.9)   | 109 (6.7)                     | 45 (7.3)             | 0.64  |
| Lipid-lowering                               |             |                               |                      |       |
| Statins (%)                                  | 315 (14)    | 233 (14.3)                    | 82 (13.2)            | 0.50  |
| Fibrates (%)                                 | 238 (10.6)  | 192 (11.8)                    | 46 (7.4)             | 0.03  |
| Ezetimibe (%)                                | 13 (0.57)   | 10 (0.6)                      | 3 (0.5)              | 0.71  |
| Aspirin (%)                                  | 195 (8.7)   | 146 (9.0)                     | 49 (7.9)             | 0.42  |
| Alpurinol (%)                                | 17 (1.0)    | 14 (1.0)                      | 3 (0.5)              | 0.20  |

SGLT-2 inhibitors: Sodium-glucose Cotransporter-2; GLP1 agonists: Glucagon-like Peptide-1 Receptor Agonists; DPP-4 inhibitors: Dipeptidyl Peptidase IV
